# Supplementary material for: Assessment of renal function in mice with unilateral ureteral obstruction using 99mTc-MAG3 dynamic scintigraphy
Source: PubMed Central journal article supplement (PMC3542003; doi:10.1186/1471-2369-13-168), 2012-12-10
Supplement: 1471-2369-13-168-S1.pdf [file 1471-2369-13-168-S1.pdf]

| <u>Phase</u>         | <u>Determinants</u>                                                                    |
|----------------------|----------------------------------------------------------------------------------------|
| 1. Linear uptake;    | renal perfusion<br>tubular uptake<br>glomerular filtration*                            |
| 2. Ascending phase;  | renal perfusion<br>tubular uptake<br>glomerular filtration*<br>early tubular excretion |
| 3. Descending phase; | tubular excretion                                                                      |

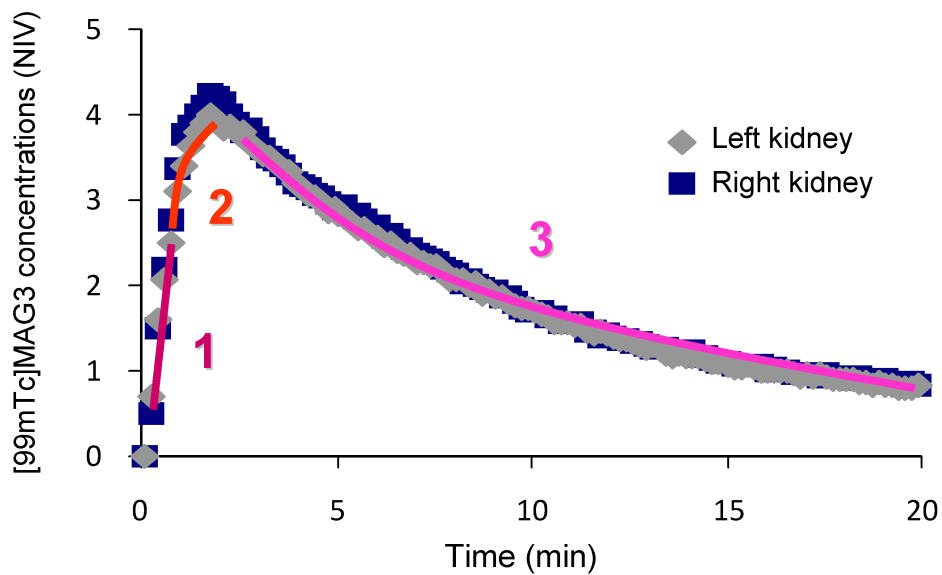

**Figure S1 Phases of <sup>99m</sup>Tc-MAG3 TACs and the factors involved in each phase.**

\* Glomerular filtration of <sup>99m</sup>Tc-MAG3 is minimum because of its high protein binding [Eshima D, Taylor A Jr. Semin Nucl Med. 1992 22(2):61-73].
